# Supplementary material for: Long-term change in the source contribution to surface ozone over Japan
Source: Copernicus journal article supplement (doi:10.5194/acp-17-8231-2017), 2017-07-07
Supplement: Supplementary file 1 [file acp-17-8231-2017-supplement.pdf]

Supplement of Atmos. Chem. Phys., 17, 8231–8246, 2017  
<https://doi.org/10.5194/acp-17-8231-2017-supplement>  
© Author(s) 2017. This work is distributed under  
the Creative Commons Attribution 3.0 License.

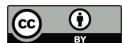

*Supplement of*

## **Long-term change in the source contribution to surface ozone over Japan**

**Tatsuya Nagashima et al.**

*Correspondence to:* Tatsuya Nagashima ([nagashima.tatsuya@nies.go.jp](mailto:nagashima.tatsuya@nies.go.jp))

The copyright of individual parts of the supplement might differ from the CC BY 3.0 License.

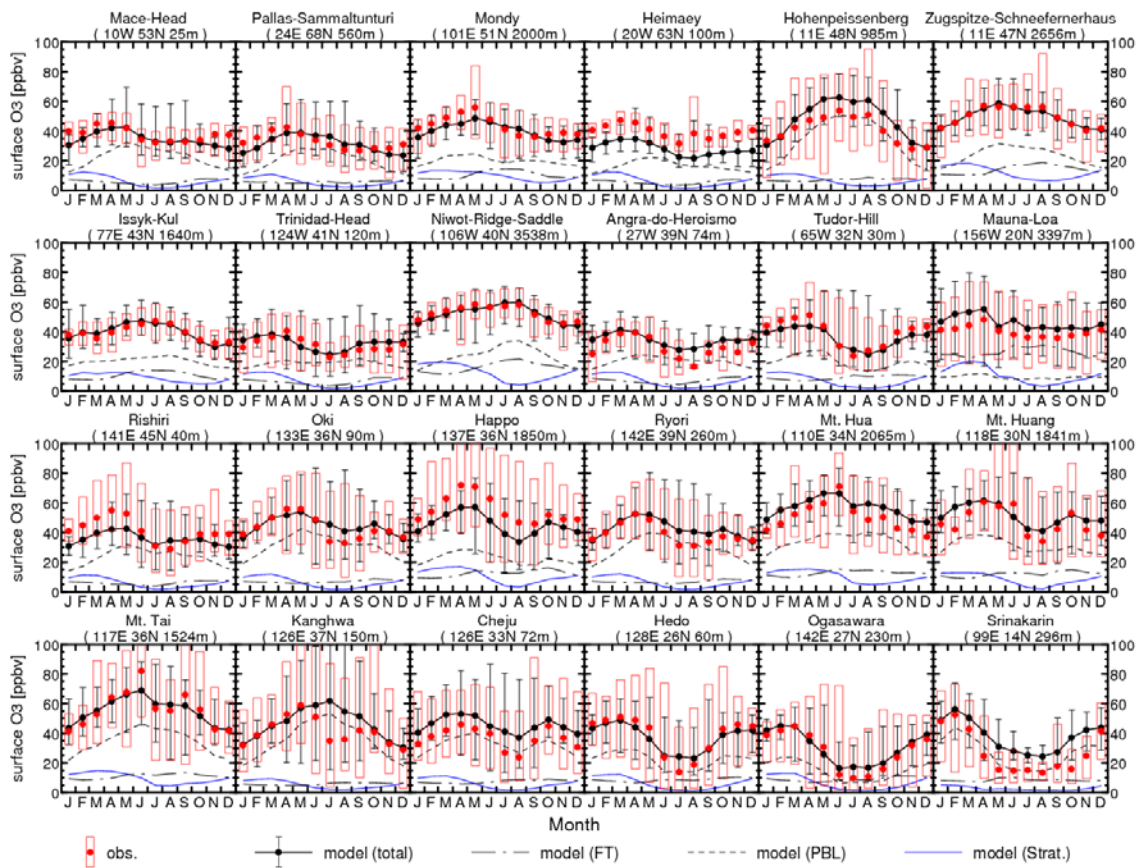

**Figure S1.** Seasonal variations of the monthly mean surface  $O_3$  observations (red filled circles) and model calculations (black circles and thick black solid lines), with contributions from the stratosphere (blue solid lines), PBL (black dashed lines), and FT (black dash-dotted lines) estimated by the model. Monthly means and each contribution are multiyear (six years for the model and available years for the observations) averaged values for 2000–2005. Vertical bars and boxes denote the multiyear range of the daily mean surface  $O_3$  for each month for the model and the observations, respectively.

**Table S1.** Statistical summary of the comparison between the observed (Obs) and modeled (Model) surface O<sub>3</sub> at observational sites shown in Figure S1. R is correlation coefficients, MB is mean bias, and RMSE is root mean square error.

| Station name               | Mean (Obs)<br>[ppbv] | Mean (Model)<br>[ppbv] | R    | MB<br>[ppbv] | RMSE<br>[ppbv] |
|----------------------------|----------------------|------------------------|------|--------------|----------------|
| Mace-Head                  | 37.81                | 34.5                   | 0.63 | -3.31        | 5.08           |
| Pallas-Sammaltunturi       | 33.02                | 31.38                  | 0.6  | -1.64        | 4.95           |
| Mondy                      | 43.5                 | 40.08                  | 0.8  | -3.42        | 5.13           |
| Heimaey                    | 39.75                | 28.12                  | 0.87 | -11.63       | 11.83          |
| Hohenpeissenberg           | 41.05                | 47.48                  | 0.94 | 6.43         | 8.27           |
| Zugspitze-Schneefernerhaus | 49.81                | 49.33                  | 0.97 | -0.48        | 1.5            |
| Issyk-Kul                  | 39.54                | 39.65                  | 0.93 | 0.11         | 2.12           |
| Trinidad-Head              | 30.92                | 32.09                  | 0.67 | 1.17         | 3.95           |
| Niwot-Ridge-Saddle         | 52.76                | 52.03                  | 0.92 | -0.73        | 2.29           |
| Angra-do-Heroismo          | 29.49                | 34.26                  | 0.88 | 4.77         | 6.05           |
| Tudor-Hill                 | 39.54                | 35.95                  | 0.96 | -3.59        | 4.74           |
| Mauna-Loa                  | 40.15                | 46.26                  | 0.86 | 6.11         | 6.57           |
| Rishiri                    | 41.33                | 35.52                  | 0.76 | -5.81        | 7.97           |
| Oki                        | 43                   | 44.51                  | 0.8  | 1.51         | 4.94           |
| Happo                      | 55.58                | 45.43                  | 0.92 | -10.15       | 10.78          |
| Ryori                      | 39.06                | 42.45                  | 0.83 | 3.39         | 5.03           |
| Mt. Hua                    | 50.29                | 56.69                  | 0.92 | 6.4          | 7.59           |
| Mt. Huang                  | 47.23                | 51.47                  | 0.77 | 4.24         | 7.1            |
| Mt. Tai                    | 56.18                | 55.16                  | 0.93 | -1.02        | 5.13           |
| Kanghwa                    | 41.33                | 46.29                  | 0.58 | 4.96         | 10.24          |
| Cheju                      | 36.75                | 45.46                  | 0.92 | 8.71         | 9.15           |
| Hedo                       | 38.42                | 37.01                  | 0.96 | -1.41        | 4.76           |
| Ogasawara                  | 28.08                | 30.28                  | 0.96 | 2.2          | 4.15           |
| Srinakaran                 | 27.35                | 38                     | 0.92 | 10.66        | 12.26          |

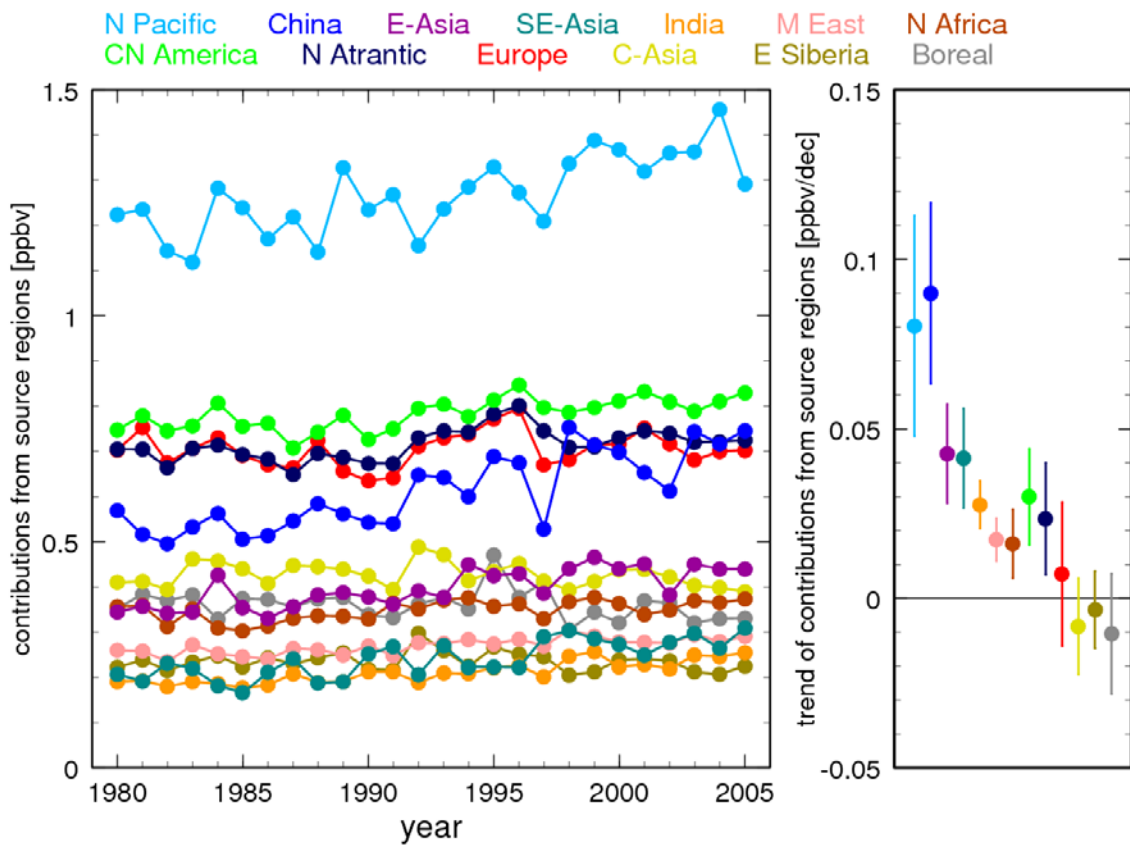

**Figure S2.** (Left) The long-term changes of annual mean contributions from source regions in the free troposphere in the Northern Hemisphere to surface O<sub>3</sub> over Japan. Some source regions are grouped: E-Asia is the sum of JPN, KOR, JPS, and ECS; SE-Asia is the sum of IDN and IDC; and CN America is the sum of AMC and AMN. (Right) The linear trends of the regional contributions in the left panel are for 1980–2005. Error bars are the 95 % confidence intervals.
